# Supplementary material for: First-line osimertinib for patients with EGFR-mutated advanced non-small cell lung cancer: efficacy and safety during the COVID-19 pandemic
Source: PubMed Central journal article supplement — Transl Lung Cancer Res. 2023 Jul 21;12(7):1454–65. doi: 10.21037/tlcr-23-81 (PMC10413024; doi:10.21037/tlcr-23-81), 2023-07-21
Supplement: tlcr-12-07-1454-dss.pdf [file tlcr-12-07-1454-dss.pdf]

## Data Sharing Statement

|                     |                                                                                                                                                     |                                                                                                                                               |
|---------------------|-----------------------------------------------------------------------------------------------------------------------------------------------------|-----------------------------------------------------------------------------------------------------------------------------------------------|
| <b>Article Info</b> | <a href="https://dx.doi.org/10.21037/tlcr-23-81">https://dx.doi.org/10.21037/tlcr-23-81</a>                                                         |                                                                                                                                               |
| <b>Item</b>         | <b>Question</b>                                                                                                                                     | <b>Authors' Response<br/>(place "-" if not applicable)</b>                                                                                    |
| 1                   | Would you like to share data collected for your study to others?                                                                                    | Yes.                                                                                                                                          |
| 2                   | If not, would you like to share the reason for your decision?                                                                                       | -                                                                                                                                             |
| 3                   | What data in particular will be shared?                                                                                                             | We will share the survival and safety data.                                                                                                   |
| 4                   | Any other documents will be shared? Such as study protocol, statistical analysis plan, informed consent form, clinical study report, analytic code. | Statistical analysis plan.                                                                                                                    |
| 5                   | When will data availability begin?                                                                                                                  | From the publication date.                                                                                                                    |
| 6                   | When will data availability end?                                                                                                                    | Three years from the publication date, since the survival data will be updated.                                                               |
| 7                   | To whom will you share the data?                                                                                                                    | Medical Oncologists and Radiation Oncologists who are interested in real world studies of Osimertinib.                                        |
| 8                   | For what type of analysis or purpose?                                                                                                               | For analyses examining the efficacy and safety of osimertinib or other EGFR tyrosine kinase inhibitors.                                       |
| 9                   | How or where can the data/documents be obtained?                                                                                                    | Emails could be sent to the address below to obtain the shared data: <a href="mailto:dksienski@bccancer.bc.ca">dksienski@bccancer.bc.ca</a> . |
| 10                  | Any other restrictions?                                                                                                                             | We may balance the potential benefits and risks for each request and then provide the data that could be shared.                              |
