# Supplementary material for: First-line osimertinib for patients with EGFR-mutated advanced non-small cell lung cancer: efficacy and safety during the COVID-19 pandemic
Source: PubMed Central journal article supplement — Transl Lung Cancer Res. 2023 Jul 21;12(7):1454–65. doi: 10.21037/tlcr-23-81 (PMC10413024; doi:10.21037/tlcr-23-81), 2023-07-21
Supplement: tlcr-12-07-1454-supplementary.pdf [file tlcr-12-07-1454-supplementary.pdf]

**Table S1** Comparison of baseline characteristics amongst patients with ECOG performance status 0–1 (n=126) and 2–4 (n=105) at initiation of osimertinib

| Characteristic             | ECOG PS 0–1, n (%) | ECOG PS 2–4, n (%) | P      |
|----------------------------|--------------------|--------------------|--------|
| Age ≥75 years              | 38 (30.2)          | 35 (33.3)          | 0.71‡  |
| Gender                     |                    |                    | 0.99†  |
| Male                       | 42 (33.3)          | 36 (34.3)          |        |
| Female                     | 84 (66.7)          | 69 (65.7)          |        |
| EGFR mutation              |                    |                    | 0.48†  |
| del19                      | 73 (57.9)          | 55 (52.4)          |        |
| L858R                      | 53 (42.1)          | 50(47.6)           |        |
| PD-L1 expression           |                    |                    | 0.30†  |
| <50%/unknown               | 93 (73.8)          | 70 (66.7)          |        |
| ≥50%                       | 33 (26.2)          | 35 (33.3)          |        |
| Smoking status             |                    |                    | 0.11†  |
| Never                      | 81 (64.3)          | 55 (52.4)          |        |
| Former                     | 41 (32.5)          | 42 (40.0)          |        |
| Current                    | 4 (3.2)            | 8 (7.6)            |        |
| CCI, median                | 0                  | 0                  | 0.90‡  |
| Brain metastases (present) | 22 (17.5)          | 35 (33.3)          | 0.008† |

†, P value for Chi-squared test; ‡, P value for Kruskal-Wallis rank sum test. Charlson Comorbidity Index, CCI; ECOG PS, Eastern Cooperative Oncology Group performance status; EGFR, epidermal growth factor receptor; n, number of patients; PD- L1, programmed death ligand 1.
